# Supplementary material for: The probiotic Companilactobacillus crustorum MN047 alleviates colitis-associated tumorigenesis via modulating the intestinal microenvironment
Source: Royal Society of Chemistry journal article supplement (doi:10.1039/d1fo01531a), 2021-01-01
Supplement: d1fo01531a1.pdf [file d1fo01531a1.pdf]

Table S1 Sequences of the primers used for quantitative Real-time PCR

| Target gene      | Forward primer (5'→3')  | Reverse primer (3'→5')  |
|------------------|-------------------------|-------------------------|
| <i>Occludin</i>  | CCCCAATGTTGAAGAGTGGGTTA | CACACTCAAGGTCAGAGGAATCT |
| <i>Claudin-1</i> | TAATTGGCATCCTGCTGGGG    | CTGGCCAAATTCATACCTGGC   |
| <i>ZO-1</i>      | GAGCAGGCTTTGGAGGAGAC    | TGGGACAAAAGTCCGGGAAG    |
| <i>TNF-α</i>     | CACAGAAAGCATGATCCGCG    | CCATTTGGGAACTTCTCATCCC  |
| <i>IL-1β</i>     | GATGAAGGGCTGCTTCCAAAC   | CTGCGAGATTTGAAGCTGGATG  |
| <i>IL-6</i>      | AGTTCCTCTCTGCAAGAGACTTC | AGTCTCCTCTCCGGACTTGT    |
| <i>IL-γ</i>      | ATGAACGCTACACACTGCATC   | CCATCCTTTTGCCAGTTCCTC   |
| <i>IL-17a</i>    | TGGA CTCTCCACCGCAATGAAG | GCTTTCCTCCGCATTGACAC    |
| <i>Cxcl1</i>     | TGCACCCAAACCGAAGTCAT    | ACTTGGGGACACCTTTTAGCAT  |
| <i>Cxcl2</i>     | GAGGGTGAGTTGGGAACTAGC   | TTCCATGAAAGCCATCCGACT   |
| <i>Cxcl3</i>     | TGAGGCAGTATTCCTTGGCTG   | ACCGGCATGACCTTGTTTGT    |
| <i>Cxcl5</i>     | TCCTCAGTCATAGCCGCAAC    | TAGCTTCTTTTTGTCACTGCCC  |
| <i>Ccl7</i>      | CCCTGGGAAGCTGTTATCTTCA  | CTCGACCCACTTCTGATGGG    |
| <i>GAPDH</i>     | AGGTCGGTGTGAACGGATTG    | TGTAGACCATGTAGTTGAGGTCA |

Table S2. The abundance of 12 genera with significant differences among the three groups

| Genus                                         | Group          |             |                            |
|-----------------------------------------------|----------------|-------------|----------------------------|
|                                               | Ctrl           | Model       | CCM                        |
| <i>Lactobacillus</i>                          | 0.247±0.06* i) | 0.139±0.022 | 0.139±0.088*               |
| <i>Bifidobacterium</i>                        | 0.125±0.069**  | 0.033±0.010 | 0.021±0.022                |
| <i>Akkermansia</i>                            | 0.034±0.026*   | 0.000±0.000 | 0.045±0.029*               |
| <i>Parabacteroides</i>                        | 0.002±0.001    | 0.003±0.002 | 0.008±0.006*               |
| <i>Clostridium_sensu_stricto_1</i>            | 0.018±0.007    | 0.019±0.010 | 0.035±0.013*               |
| <i>Bacteroides</i>                            | 0.007±0.003    | 0.011±0.005 | 0.025±0.016 <sup>b</sup> * |
| <i>Parasutterella</i>                         | 0.005±0.003    | 0.008±0.004 | 0.002±0.001*               |
| <i>Ruminococcaceae_UCG-013</i>                | 0.002±0.002    | 0.006±0.005 | 0.011±0.003*               |
| <i>Candidatus_Saccharimonas</i>               | 0.009±0.006*   | 0.036±0.022 | 0.020±0.010                |
| <i>Ruminococcaceae_UCG-014</i>                | 0.020±0.007*   | 0.045±0.019 | 0.036±0.015                |
| <i>Turicibacter</i>                           | 0.056±0.042**  | 0.164±0.063 | 0.087±0.011*               |
| <i>uncultured_bacterium_o_Mollicutes_RF39</i> | 0.002±0.002*** | 0.010±0.003 | 0.004±0.003**              |

i) All data were expressed as the mean ± SD (n=5 mice/group). Significant differences among different groups were determined by one-way analysis of variance (ANOVA), followed by Tukey's test for multiple comparisons. The value of  $p < 0.05$  was considered statistically significant (\*  $p < 0.05$ , \*\*  $p < 0.01$  and \*\*\*  $p < 0.001$  compared to the Model group).

## Supplementary Figure

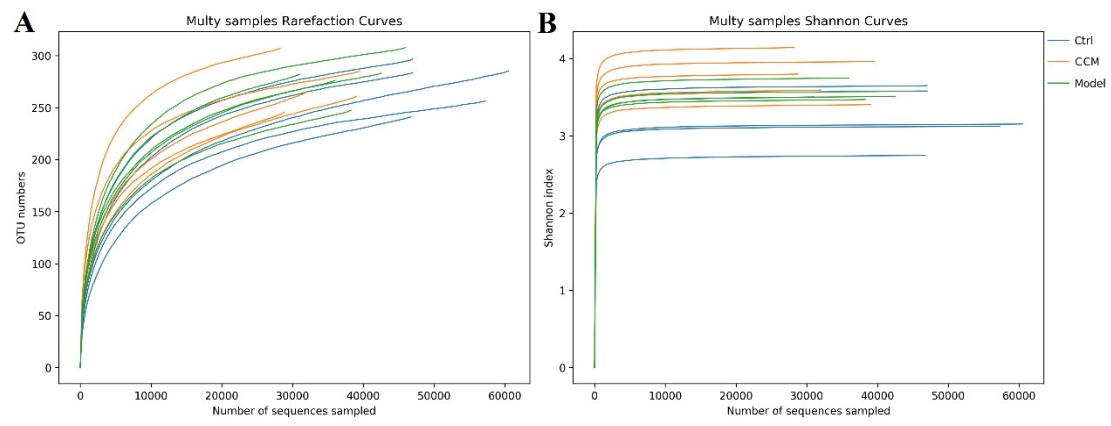

Fig. S1 (A) Rarefaction and (B) Shannon curves of intestinal microbiota.
